# Supplementary material for: Near real-time inversion of high-resolution anthropogenic carbon emissions in the Pearl River Delta region based on the four-dimensional local ensemble transform Kalman filter
Source: Copernicus journal article supplement (doi:10.5194/egusphere-2025-6272), 2025-12-31
Supplement: Supplementary file 1 [file egusphere-2025-6272-supplement.pdf]

# Near real-time inversion of high-resolution anthropogenic carbon emissions in the Pearl River Delta region based on the four-dimensional local ensemble transform Kalman filter

Yike Wag<sup>1</sup>, Yueming Cheng<sup>2</sup>, Boru Mai<sup>1</sup>, Tie Dai<sup>2</sup>, Xuejiao Deng<sup>1</sup>, Yiwei Diao<sup>3</sup>, Feng Xia<sup>1</sup>, Miao Liang<sup>4</sup>, Ying Li<sup>5</sup>, Yixiao Zhu<sup>1</sup>

<sup>1</sup>Institute of Tropical and Marine Meteorology, China Meteorological Administration (CMA), Guangzhou, China

<sup>2</sup>State Key Laboratory of Numerical Modeling for Atmospheric Sciences and Geophysical Fluid Dynamics, Institute of Atmospheric Physics, Chinese Academy of Sciences, Beijing, China

<sup>3</sup>Wuxi University, Wuxi, China

<sup>4</sup>Meteorological Observation Center, China Meteorological Administration, Beijing, China.

<sup>5</sup>Department of Ocean Science and Engineering, Southern University of Science and Technology, Shenzhen, China

**Correspondence:** Boru Mai (mbr4@163.com), Tie Dai (daitie@mail.iap.ac.cn )

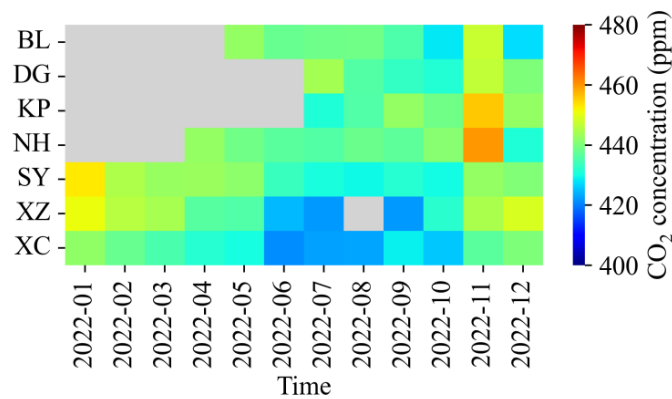

Figure S1. Time series of observational CO<sub>2</sub> concentrations in the Pearl River Delta (PRD) region in 2022. BL: Boluo Station, DG: Dongguan Station, KP: Kaiping Station, NH: Nanhai Station, SY: Shiyen Station, XZ: Xiangzhou Station, XC: Xichong Station

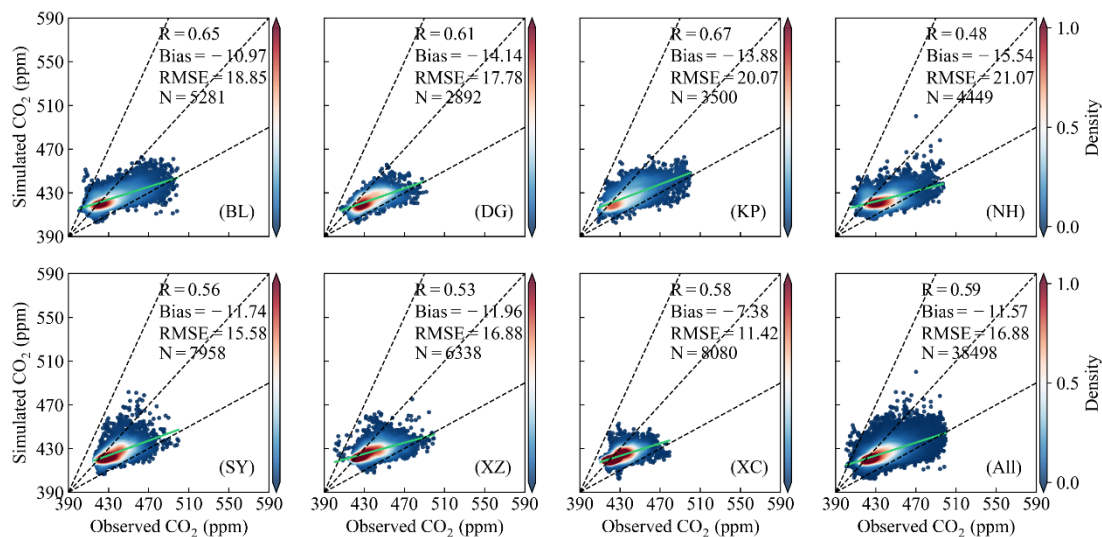

Figure S2. Comparison of hourly CO<sub>2</sub> concentrations from the forward assimilation GRACES-GHG-DA system (Guangzhou Regional Atmospheric Composition and Environment Forecasting System–Greenhouse Gas–Data Assimilation) with observations. BL: Boluo Station, DG: Dongguan Station, KP: Kaiping Station, NH: Nanhai Station, SY: Shiyen Station, XZ: Xiangzhou Station, XC: Xichong Station, All: Aggregated results of all aforementioned stations.

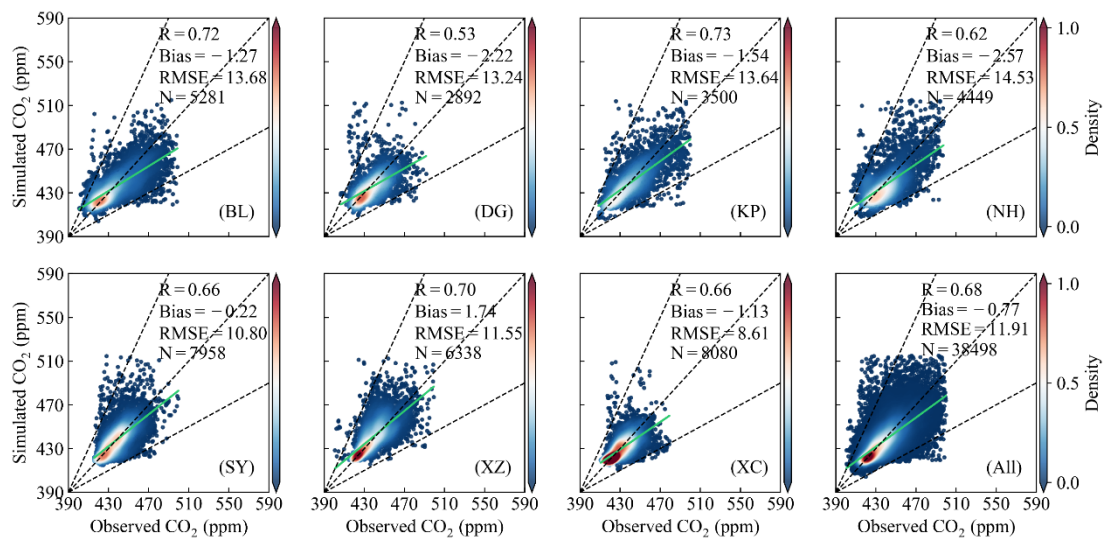

55 Figure S3. Comparison of hourly CO<sub>2</sub> concentrations from the post-assimilation GRACES-GHG-DA system (Guangzhou Regional Atmospheric Composition and Environment Forecasting System–Greenhouse Gas–Data Assimilation) with observations. BL: Boluo Station, DG: Dongguan Station, KP: Kaiping Station, NH: Nanhai Station, SY: Shiyan Station, XZ: Xiangzhou Station, XC: Xichong Station, All: Aggregated results of all aforementioned stations.

60

65

70

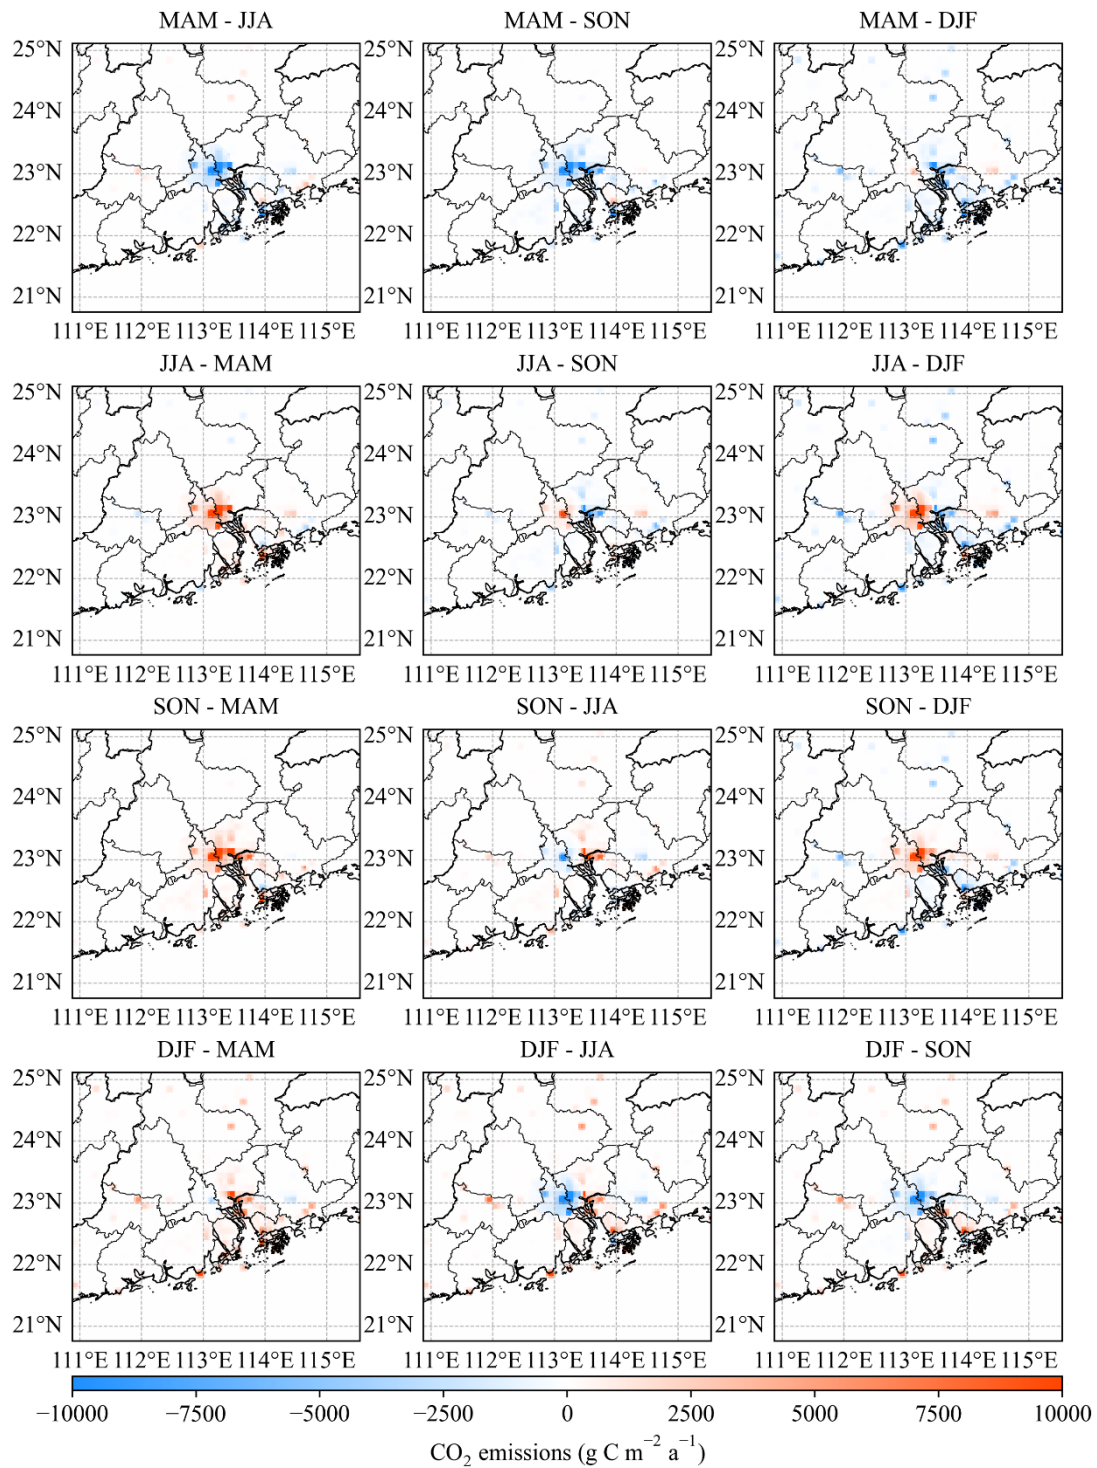

Figure S4. Seasonal differences in inversed CO<sub>2</sub> emissions over the Pearl River Delta (PRD) region in 2022. MAM, JJA, SON, and DJF denote March–May, June–August, September–November, and December–February, respectively. The color bar represents CO<sub>2</sub> emissions.

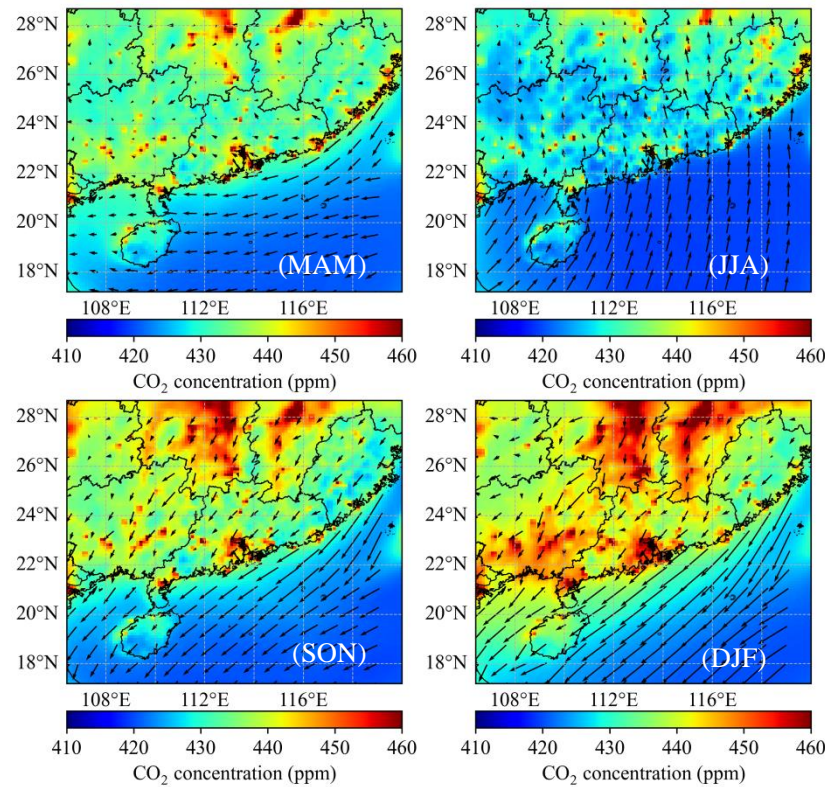

Figure S5. Seasonal distribution of atmospheric CO<sub>2</sub> concentrations over Southern China in 2022. MAM, JJA, SON, and DJF denote March to May, June to August, September to November, and December to February, respectively. The color bar represents CO<sub>2</sub> concentrations.
